# Supplementary material for: Characterization of human mesenchymal stem cell secretome at early steps of adipocyte and osteoblast differentiation
Source: Springer Nature journal article supplement (doi:10.1186/1471-2199-9-26), 2008-01-01
Supplement: Additional file 3 [file 1471-2199-9-26-s3.pdf]

| <i>gene</i>          | <i>forward primer (5'-3')</i> | <i>reverse primer (5'-3')</i> | <i>T * (°C)</i> | <i>size (bp)</i> | <i>Accession N°</i> |
|----------------------|-------------------------------|-------------------------------|-----------------|------------------|---------------------|
| <b>Human</b>         |                               |                               |                 |                  |                     |
| b-actin              | AGCCATGTACGTTGCTA             | AGTCCGCCTAGAAGCA              | 55              | 743              | NM_001101           |
| UPAR                 | CTGGAGCTGGTGGAGAAAAG          | TGTTGCAGCATTTCAGGAAG          | 57              | 406              | NM_001005377        |
| TBP                  | CACGAACCACGGCACTGATT          | TTTTCTTGCTGCCAGTCTGGAC        | 60              | 88               | NM_003194           |
| Alkaline Phosphatase | GCGCAAGAGACACTGAAATATGC       | TGGTGGAGCTGACCCTTGAG          | 60              | 140              | NM_000478           |
| Adiponectin          | GCAGTCTGTGGTTCTGATTCCATAC     | GCCCTTGAGTCGTGGTTTCC          | 60              | 111              | NM_004797           |
| hPAI-1               | ACCTGGGAATGACCGACATGT         | CTCTCGTTCACCTCGATCTTCACT      | 60              | 118              | NM_000602           |
| <b>Mouse</b>         |                               |                               |                 |                  |                     |
| mTBP                 | ACCCTTCACCAATGACTCCTATG       | ATGATGACTGCAGCAAATCGC         | 60              | 189              | NM_013684           |
| mPAI-1               | CCGATGGGCTCGAGTATGA           | TTGTCTGATGAGTTCAGCATCCA       | 60              | 136              | NM_008871           |

\* Annealing temperature
